# Supplementary material for: Proteomics of resistance to Notch1 inhibition in acute lymphoblastic leukemia reveals targetable kinase signatures
Source: PubMed Central journal article supplement (PMC8097059; doi:10.1038/s41467-021-22787-9), 2021-05-04
Supplement: 41467_2021_22787_MOESM9_ESM.pdf [file 41467_2021_22787_MOESM9_ESM.pdf]

## Reporting Summary

Nature Research wishes to improve the reproducibility of the work that we publish. This form provides structure for consistency and transparency in reporting. For further information on Nature Research policies, see our [Editorial Policies](#) and the [Editorial Policy Checklist](#).

### Statistics

For all statistical analyses, confirm that the following items are present in the figure legend, table legend, main text, or Methods section.

n/a Confirmed

- |                                     |                                     |                                                                                                                                                                                                                                                            |
|-------------------------------------|-------------------------------------|------------------------------------------------------------------------------------------------------------------------------------------------------------------------------------------------------------------------------------------------------------|
| <input type="checkbox"/>            | <input checked="" type="checkbox"/> | The exact sample size ( $n$ ) for each experimental group/condition, given as a discrete number and unit of measurement                                                                                                                                    |
| <input type="checkbox"/>            | <input checked="" type="checkbox"/> | A statement on whether measurements were taken from distinct samples or whether the same sample was measured repeatedly                                                                                                                                    |
| <input type="checkbox"/>            | <input checked="" type="checkbox"/> | The statistical test(s) used AND whether they are one- or two-sided<br><i>Only common tests should be described solely by name; describe more complex techniques in the Methods section.</i>                                                               |
| <input checked="" type="checkbox"/> | <input type="checkbox"/>            | A description of all covariates tested                                                                                                                                                                                                                     |
| <input type="checkbox"/>            | <input checked="" type="checkbox"/> | A description of any assumptions or corrections, such as tests of normality and adjustment for multiple comparisons                                                                                                                                        |
| <input type="checkbox"/>            | <input checked="" type="checkbox"/> | A full description of the statistical parameters including central tendency (e.g. means) or other basic estimates (e.g. regression coefficient) AND variation (e.g. standard deviation) or associated estimates of uncertainty (e.g. confidence intervals) |
| <input type="checkbox"/>            | <input checked="" type="checkbox"/> | For null hypothesis testing, the test statistic (e.g. $F$ , $t$ , $r$ ) with confidence intervals, effect sizes, degrees of freedom and $P$ value noted<br><i>Give <math>P</math> values as exact values whenever suitable.</i>                            |
| <input checked="" type="checkbox"/> | <input type="checkbox"/>            | For Bayesian analysis, information on the choice of priors and Markov chain Monte Carlo settings                                                                                                                                                           |
| <input checked="" type="checkbox"/> | <input type="checkbox"/>            | For hierarchical and complex designs, identification of the appropriate level for tests and full reporting of outcomes                                                                                                                                     |
| <input type="checkbox"/>            | <input checked="" type="checkbox"/> | Estimates of effect sizes (e.g. Cohen's $d$ , Pearson's $r$ ), indicating how they were calculated                                                                                                                                                         |

*Our web collection on [statistics for biologists](#) contains articles on many of the points above.*

### Software and code

Policy information about [availability of computer code](#)

Data collection

Data analysis

For manuscripts utilizing custom algorithms or software that are central to the research but not yet described in published literature, software must be made available to editors and reviewers. We strongly encourage code deposition in a community repository (e.g. GitHub). See the Nature Research [guidelines for submitting code & software](#) for further information.

### Data

Policy information about [availability of data](#)

All manuscripts must include a [data availability statement](#). This statement should provide the following information, where applicable:

- Accession codes, unique identifiers, or web links for publicly available datasets
- A list of figures that have associated raw data
- A description of any restrictions on data availability

All raw mass spectrometric data files generated in this study have been deposited to the ProteomeXchange Consortium via the PRIDE partner repository with the dataset identifier PXD018744.

The human Swiss-Prot database used for raw data search was downloaded from the UniProt database [[https://www.uniprot.org/uniprot/?query=%\\*&fil=organism%3A%22Homo+sapiens+%28Human%29+%5B9606%5D%22+AND+reviewed%3Ayes](https://www.uniprot.org/uniprot/?query=%*&fil=organism%3A%22Homo+sapiens+%28Human%29+%5B9606%5D%22+AND+reviewed%3Ayes)].

RNAseq gene expression data used in Fig. 6b and S10a were obtained from the CCLE database (Expression Public 19Q3 dataset) and were downloaded from the DepMap portal, by using the "Data Explorer" tool [<https://depmap.org/portal/interactive>].

Gene expression data used in Fig. S5a were downloaded from GEO [<https://www.ncbi.nlm.nih.gov/geo>] (accession number GSE54380). Gene expression data used in Fig. S6a were downloaded from GEO (accession number GSE123751).

RNAseq gene expression data used in Fig. S10b were downloaded from the supplementary information of the Liu et al. (table S5).

Survival data used in Fig. 2g and S4b were obtained from the Genomics of Drug Sensitivity in Cancer project [<https://www.cancerrxgene.org>], dataset GDSC1.

Data used in Fig. S9a-b were downloaded from the supplementary material of Klaeger et al. (tables S2 and S6).

Source data are provided with this paper. There are no restrictions on data availability.

## Field-specific reporting

Please select the one below that is the best fit for your research. If you are not sure, read the appropriate sections before making your selection.

Life sciences  Behavioural & social sciences  Ecological, evolutionary & environmental sciences

For a reference copy of the document with all sections, see [nature.com/documents/nr-reporting-summary-flat.pdf](https://www.nature.com/documents/nr-reporting-summary-flat.pdf)

## Life sciences study design

All studies must disclose on these points even when the disclosure is negative.

|                 |                                                                                                                                                                                                                                                                                                                                                 |
|-----------------|-------------------------------------------------------------------------------------------------------------------------------------------------------------------------------------------------------------------------------------------------------------------------------------------------------------------------------------------------|
| Sample size     | 2-10 biological replicates were chosen based on the user's experience, in order to obtain sufficient downstream statistical power. No statistical method to calculate sample size was used.                                                                                                                                                     |
| Data exclusions | Two out of 31 in-vivo samples (PDTALL19_aN1_AT_B and PDTALL11_aN1_4) were considered outliers and excluded from the statistical analysis of the proteomics data.                                                                                                                                                                                |
| Replication     | For in-vitro proteomics experiments, biologically independent replicates were carried out by harvesting cells on different days (different passage number).<br>For in-vivo proteomics experiments, biologically independent replicates were represented by different mice.<br>Downstream sample preparation was always carried out in parallel. |
| Randomization   | Allocation of cell wells / cell flasks / mice to experimental or control groups was random.<br>Randomization in sample acquisition was not carried out to reduce the chances of human error. All samples from one replicate were analyzed first and then the next replicate.                                                                    |
| Blinding        | Blinding was not carried out, as human participants were not involved in the study. Double blinding would not have been possible to carry out, as the user performing the experiment was the same person acquiring and analyzing the data.                                                                                                      |

## Reporting for specific materials, systems and methods

We require information from authors about some types of materials, experimental systems and methods used in many studies. Here, indicate whether each material, system or method listed is relevant to your study. If you are not sure if a list item applies to your research, read the appropriate section before selecting a response.

### Materials & experimental systems

|                                     |                                                                 |
|-------------------------------------|-----------------------------------------------------------------|
| n/a                                 | Involved in the study                                           |
| <input type="checkbox"/>            | <input checked="" type="checkbox"/> Antibodies                  |
| <input type="checkbox"/>            | <input checked="" type="checkbox"/> Eukaryotic cell lines       |
| <input checked="" type="checkbox"/> | <input type="checkbox"/> Palaeontology and archaeology          |
| <input type="checkbox"/>            | <input checked="" type="checkbox"/> Animals and other organisms |
| <input checked="" type="checkbox"/> | <input type="checkbox"/> Human research participants            |
| <input checked="" type="checkbox"/> | <input type="checkbox"/> Clinical data                          |
| <input checked="" type="checkbox"/> | <input type="checkbox"/> Dual use research of concern           |

### Methods

|                                     |                                                    |
|-------------------------------------|----------------------------------------------------|
| n/a                                 | Involved in the study                              |
| <input checked="" type="checkbox"/> | <input type="checkbox"/> ChIP-seq                  |
| <input type="checkbox"/>            | <input checked="" type="checkbox"/> Flow cytometry |
| <input checked="" type="checkbox"/> | <input type="checkbox"/> MRI-based neuroimaging    |

## Antibodies

Antibodies used

Cleaved Notch1 (Val1744), Cell Signaling Cat#4147  
Phospho-S6 Ribosomal Protein (Ser235/236), Cell Signaling Cat#4858  
S6 Ribosomal Protein, Santa Cruz Biotechnology Cat#74459  
Phospho-PKCδ (Thr505), Cell Signaling Cat#9374  
Phospho-PKCδ/θ (Ser643/676), Cell Signaling Cat#9376  
Phospho PKCδ (Ser299), Abcam Cat#133456  
PKCδ, Cell Signaling Cat#9616  
PTEN, Cell Signaling Cat#9188  
Phospho-Akt (Ser473), Cell Signaling Cat#4060

Phospho-Akt (Thr 308), Cell Signaling Cat#4056  
 Akt, Cell Signaling Cat#9272  
 c-Myc, Cell Signaling Cat#5605  
 $\gamma$ -Tubulin, Sigma Aldrich Cat#5326  
 Vinculin, Sigma Aldrich Cat#V9264  
 $\beta$ -Actin, Santa Cruz Biotechnology Cat#47778  
 Cleaved caspase-3, Cell Signaling Cat#9664  
 Cleaved PARP, Cell Signaling Cat#5625  
 Anti-rabbit HRP conjugated secondary antibody, Jackson ImmunoResearch 111-036-045  
 Anti-mouse HRP conjugated secondary antibody, Jackson ImmunoResearch 115-036-062

Validation

All antibodies used were commercial and validated by supplier.  
 Western blotting: all antibodies used showed a specific band at the expected MW according to the protein marker.  
 Flow cytometry: all antibodies were validated by staining the cells with the isotype control antibody.  
 Cell cycle analysis: unstained cells were used as negative control.

## Eukaryotic cell lines

Policy information about [cell lines](#)

Cell line source(s)

The human cell lines JURKAT (Clone E6-1) and MOLT-3 were purchased from ATCC. The human cell lines DND-41, HPB-ALL, ALL-SIL and PEER were purchased from DSMZ.

Authentication

Cell lines were authenticated by STR profiling using the ATCC authentication service according to manufacturers' instructions.

Mycoplasma contamination

All cell lines tested negative for mycoplasma contamination, evaluated using the EZ PCR Mycoplasma detection Kit (Biological Industries).

Commonly misidentified lines  
 (See [ICLAC](#) register)

No commonly misidentified cell lines were used in the study.

## Animals and other organisms

Policy information about [studies involving animals](#); [ARRIVE guidelines](#) recommended for reporting animal research

Laboratory animals

6-8 weeks old female NOD/SCID (NOD.CB17-Prkdcscid/NCrCrI) mice, purchased from Charles River Laboratories (Wilmington, MA, USA).

Wild animals

No wild animals were used in the study.

Field-collected samples

No field collected samples were used in the study.

Ethics oversight

Procedures involving animals conformed current laws and policies (EEC Council Directive 86/609, OJ L 358, 12/12 1987) and were authorized by the Italian Ministry of Health (894/2016-PR).

Note that full information on the approval of the study protocol must also be provided in the manuscript.

## Flow Cytometry

### Plots

Confirm that:

- The axis labels state the marker and fluorochrome used (e.g. CD4-FITC).
- The axis scales are clearly visible. Include numbers along axes only for bottom left plot of group (a 'group' is an analysis of identical markers).
- All plots are contour plots with outliers or pseudocolor plots.
- A numerical value for number of cells or percentage (with statistics) is provided.

### Methodology

Sample preparation

Flow cytometry analysis of T-ALL PDX cells

Leukemic cells were collected from peripheral blood, spleen and BM of control and treated mice. Fluorescein isothiocyanate-labeled mAb against CD5 and phycoerythrin-Cy5-labeled mAb against CD7 (Coulter) were used for the detection of T-ALL cells in mouse samples. Samples were analyzed on the BD FACSCelesta flow cytometer. BD FACSDiva software was used for data acquisition and analysis.

Cell cycle analysis

1-2 x 10<sup>6</sup> cells were stained with the ghost dye violet 450 (Tonbo Biosciences), then fixed and permeabilized by using the Foxp3/Transcription Factor Staining Buffer Set (eBioscience), according to the manufacturer's instructions. DNA was stained by using a solution of 7-Aminoactinomycin D (7-AAD; Sigma-Aldrich), Ribonuclease A from bovine pancreas (Sigma-Aldrich) and PBS (Gibco). Cells were analyzed on a LSR Fortessa (BD Biosciences) flow cytometer; raw data were acquired through the

|                           |                                                                                                                                                                                                                                                           |
|---------------------------|-----------------------------------------------------------------------------------------------------------------------------------------------------------------------------------------------------------------------------------------------------------|
|                           | BD FACSDiva software and analyzed by using the ModFit LT software.                                                                                                                                                                                        |
| Instrument                | LSR Fortessa, BD FACSCelesta                                                                                                                                                                                                                              |
| Software                  | BD FACSDiva software, ModFit LT V.4.1.7                                                                                                                                                                                                                   |
| Cell population abundance | Leukemic cells in blood were measured in the lymphocyte gate in the FSCA vs SSC-A plot (25% population abundance as average value). This value is adequate for further analysis, considering a 62% average value of fragments in the population analyzed. |
| Gating strategy           | FSC-A/SSC-A (for both mice and cell cycle); FSC-W/FSC-H, FSC-A/405D-A (for cell cycle only)                                                                                                                                                               |

Tick this box to confirm that a figure exemplifying the gating strategy is provided in the Supplementary Information.
